# Supplementary material for: Monohydrate and anhydrate of nylon 5I monomer 1,5-pentanediamine–isophthalate
Source: Royal Society of Chemistry journal article supplement (doi:10.1039/d0ra08767j), 2020-01-01

## Supporting information

**Figure S1** The asymmetric unit diagrams of the PDA-IPA crystal forms, showing the atom-numbering schemes. Displacement ellipsoids are drawn at the 50% probability level.

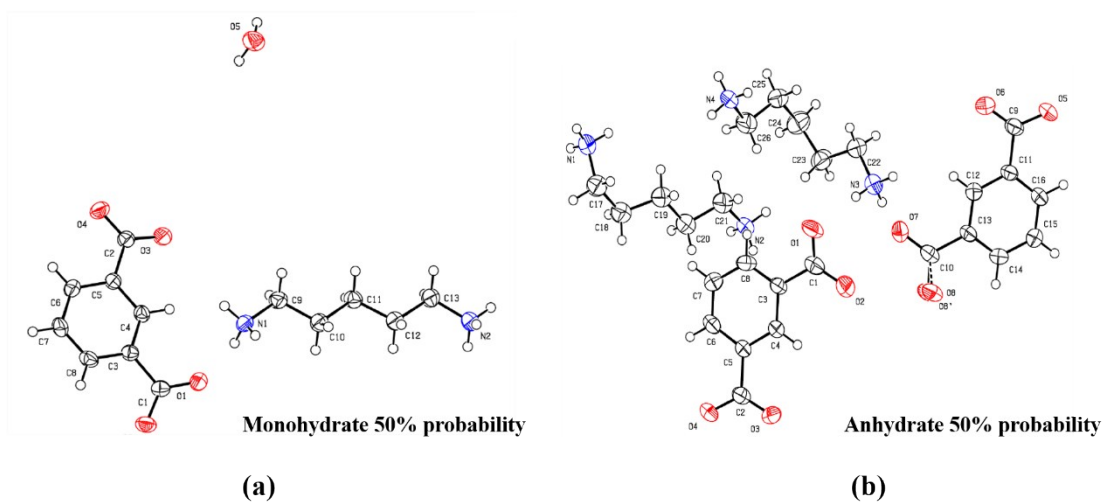

**Figure S2** Packing diagrams of the PDA-IPA monohydrate (a) and anhydrate (b).

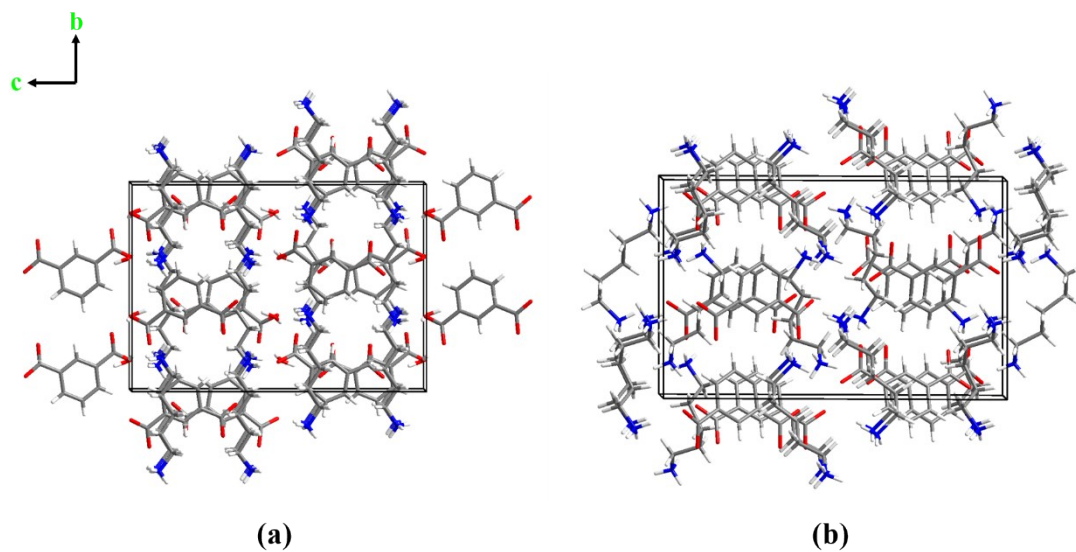

**Table S1** Hydrogen bonds data of the PDA-IPA two crystal forms.

| Monohydrate |            |              |              |         |
|-------------|------------|--------------|--------------|---------|
| D—H···A     | D(D-H) / Å | d(H···A) / Å | d(D···A) / Å | D—H···A |
| N1—H1A···O1 | 0.8900     | 2.0400       | 2.911(2)     | 167.00  |
| N1—H1B···O3 | 0.8900     | 1.7800       | 2.637(2)     | 159.00  |
| N1—H1C···O2 | 0.8900     | 1.9800       | 2.849(2)     | 163.00  |
| N2—H2A···O2 | 0.8900     | 1.9000       | 2.781(2)     | 171.00  |
| N2—H2B···O4 | 0.8900     | 1.9300       | 2.779(2)     | 160.00  |
| N2—H2C···O5 | 0.8900     | 1.9600       | 2.814(2)     | 161.00  |
| O5—H5C···O1 | 0.8500     | 2.0300       | 2.870(2)     | 170.00  |
| O5—H5D···O4 | 0.8500     | 1.9200       | 2.757(2)     | 170.00  |
| C7—H7···O1  | 0.9300     | 2.5200       | 3.258(2)     | 136.00  |

  

| Anhydrate     |            |              |              |         |
|---------------|------------|--------------|--------------|---------|
| D—H···A       | D(D-H) / Å | d(H···A) / Å | d(D···A) / Å | D—H···A |
| N1—H1A···O8   | 0.8900     | 1.9100       | 2.792(3)     | 169.00  |
| N1—H1B···O2   | 0.8900     | 1.9400       | 2.809(3)     | 167.00  |
| N1—H1C···O6   | 0.8900     | 1.9100       | 2.793(3)     | 174.00  |
| N2—H2A···O5   | 0.8900     | 1.9200       | 2.790(3)     | 166.00  |
| N2—H2B···O5   | 0.8900     | 1.8900       | 2.755(3)     | 162.00  |
| N2—H2C···O7   | 0.8900     | 1.9700       | 2.851(3)     | 171.00  |
| N3—H3A···O1   | 0.8900     | 1.9500       | 2.823(3)     | 165.00  |
| N3—H3B···O3   | 0.8900     | 1.8700       | 2.754(3)     | 175.00  |
| N3—H3C···O7   | 0.8900     | 1.9100       | 2.787(3)     | 170.00  |
| N4—H4A···O2   | 0.8900     | 1.9000       | 2.785(3)     | 177.00  |
| N4—H4B···O4   | 0.8900     | 1.9200       | 2.791(3)     | 167.00  |
| N4—H4C···O4   | 0.8900     | 1.9400       | 2.808(3)     | 165.00  |
| C4—H4···O3    | 0.9300     | 2.5100       | 2.816(3)     | 100.00  |
| C19—H19B···O8 | 0.9700     | 2.3400       | 3.250(4)     | 156.00  |
| C22—H22B···O1 | 0.9700     | 2.5200       | 3.255(4)     | 133.00  |

**Table S2** Torsion angles (°) data of the PDA-IPA two crystal forms.

| Monohydrate                  |             | Anhydrate      |           |
|------------------------------|-------------|----------------|-----------|
| O1-C1-C3-C4                  | 8.8(3)      | O1-C1-C3-C4    | -161.4(3) |
| O1-C1-C3-C8                  | -173.09(18) | O1-C1-C3-C8    | 17.8(4)   |
| O2-C1-C3-C4                  | -170.06(18) | O2-C1-C3-C4    | -19.2(4)  |
| O2-C1-C3-C8                  | 8.1(3)      | O2-C1-C3-C8    | -161.6(3) |
| O3-C2-C5-C4                  | 4.4(3)      | O3-C2-C5-C4    | -9.1(4)   |
| O3-C2-C5-C6                  | -174.43(19) | O3-C2-C5-C6    | 173.5(3)  |
| O4-C2-C5-C4                  | 4.0(3)      | O4-C2-C5-C4    | 170.4(3)  |
| C1-C3-C4-C5                  | 177.56(17)  | O4-C2-C5-C6    | -7.1(4)   |
| C8-C3-C4-C5                  | -0.6(3)     | C1-C3-C4-C5    | 179.5(3)  |
| C1-C3-C8-C7                  | -177.74(18) | C8-C3-C4-C5    | 0.3(4)    |
| C4-C3-C8-C7                  | 0.4(3)      | C1-C3-C8-C7    | 179.5(3)  |
| C3-C4-C5-C2                  | -178.37(17) | C4-C3-C8-C7    | -1.3(4)   |
| C3-C4-C5-C6                  | 0.5(3)      | C3-C4-C5-C2    | -176.4(3) |
| C2-C5-C6-C7                  | 178.62(19)  | C3-C4-C5-C6    | 1.2(4)    |
| C4-C5-C6-C7                  | -0.2(3)     | C2-C5-C6-C7    | 175.7(3)  |
| C5-C6-C7-C8                  | 0.1(3)      | C4-C5-C6-C7    | -1.8(4)   |
| C6-C7-C8-C3                  | -0.2(3)     | C5-C6-C7-C8    | 1.0(4)    |
| N1-C9-C10-C11                | 178.13(17)  | C6-C7-C8-C3    | 0.6(4)    |
| C9-C10-C11-C12               | 174.65(18)  | O5-C9-C11-C12  | 174.1(3)  |
| C10-C11-C12-C13              | -176.08(18) | O5-C9-C11-C16  | -9.0(4)   |
| C11-C12-C13-N2               | -178.68(17) | O6-C9-C11-C12  | -7.0(4)   |
| <b>Anhydrate (continued)</b> |             |                |           |
|                              |             | O6-C9-C11-C16  | 170.0(3)  |
|                              |             | O7-C10-C13-C12 | 17.4(4)   |
|                              |             | O7-C10-C13-C14 | -159.8(3) |
|                              |             | O8-C10-C13-C12 | -167.4(3) |
|                              |             | O8-C10-C13-C14 | 15.5(4)   |
|                              |             | C9-C11-C12-C13 | 177.5(3)  |

|                 |           |
|-----------------|-----------|
| C16-C11-C12-C13 | 0.5(4)    |
| C9-C11-C16-C15  | -176.7(3) |
| C12-C11-C16-C15 | 0.4(4)    |
| C11-C12-C13-C10 | -178.0(3) |
| C11-C12-C13-C14 | -0.8(4)   |
| C10-C13-C14-C15 | 177.6(3)  |
| C12-C13-C14-C15 | 0.3(4)    |
| C13-C14-C15-C16 | 0.5(4)    |
| C14-C15-C16-C11 | -0.8(4)   |
| N1-C17-C18-C19  | 69.3(4)   |
| C17-C18-C19-C20 | -179.6(3) |
| C18-C19-C20-C21 | 168.3(3)  |
| C19-C20-C21-N2  | -174.3(3) |
| N3-C22-C23-C24  | 168.9(2)  |
| C22-C23-C24-C25 | -68.8(4)  |
| C23-C24-C25-C26 | -66.1(4)  |
| C24-C25-C26-N4  | 175.3(2)  |

**Figure S3** Hirshfeld surface and its corresponding fingerprint plots of the monohydrate.

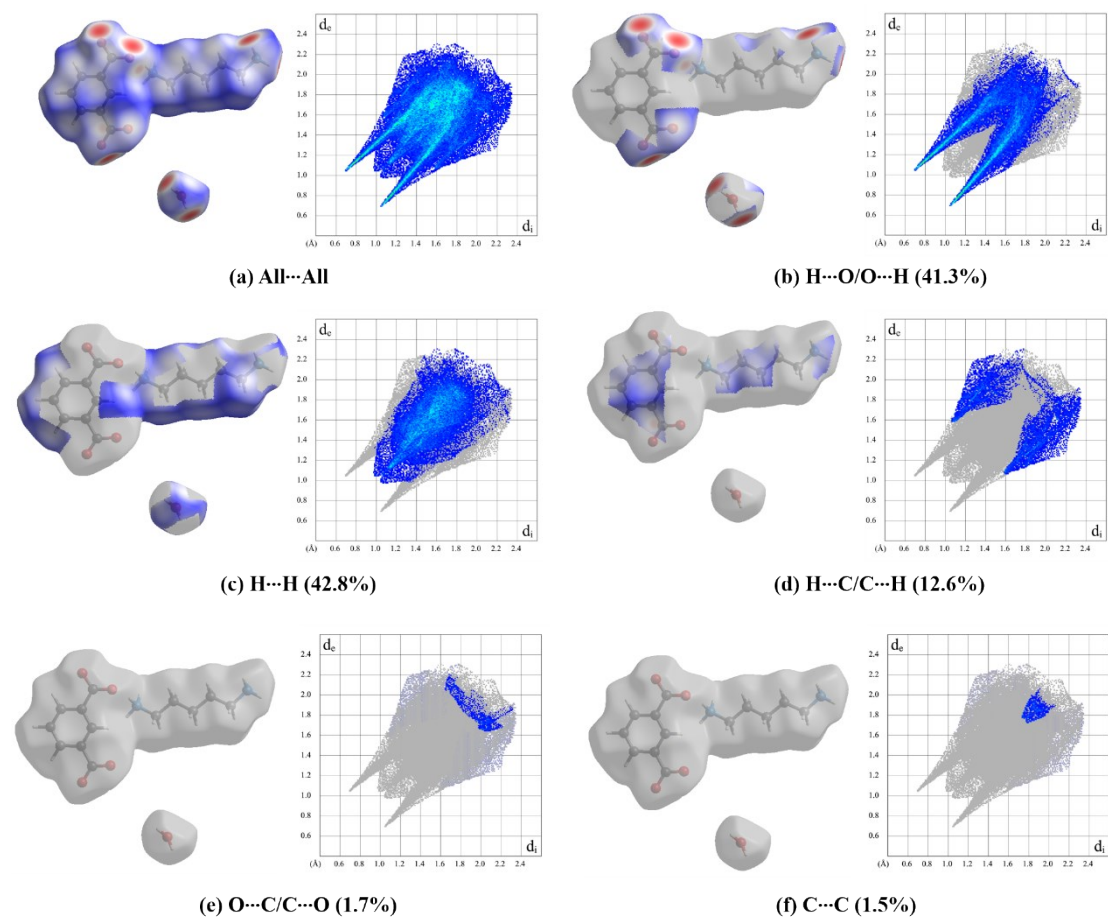

**Figure S4** Hirshfeld surface and its corresponding fingerprint plots of the anhydrous form.

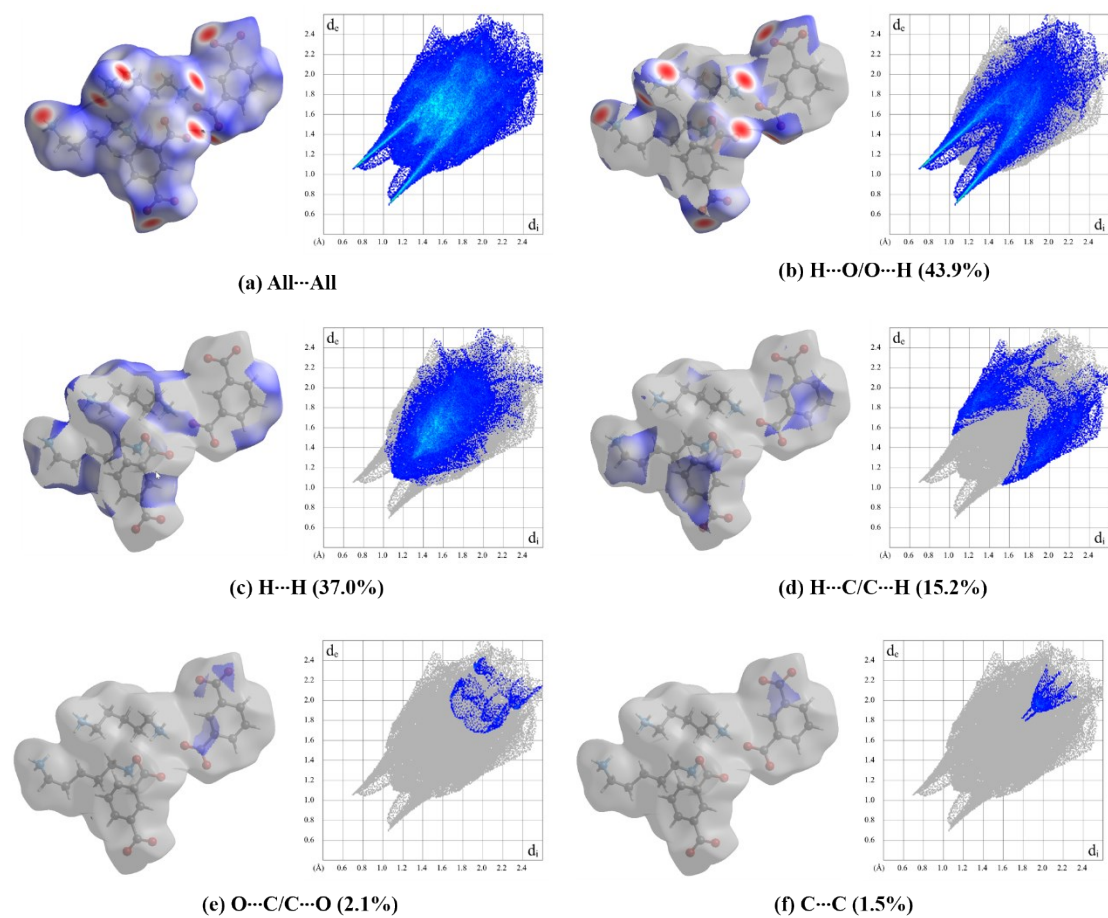

**Figure S5** The distance of hydrogen-bond contacts of the monohydrate in Figure 7.

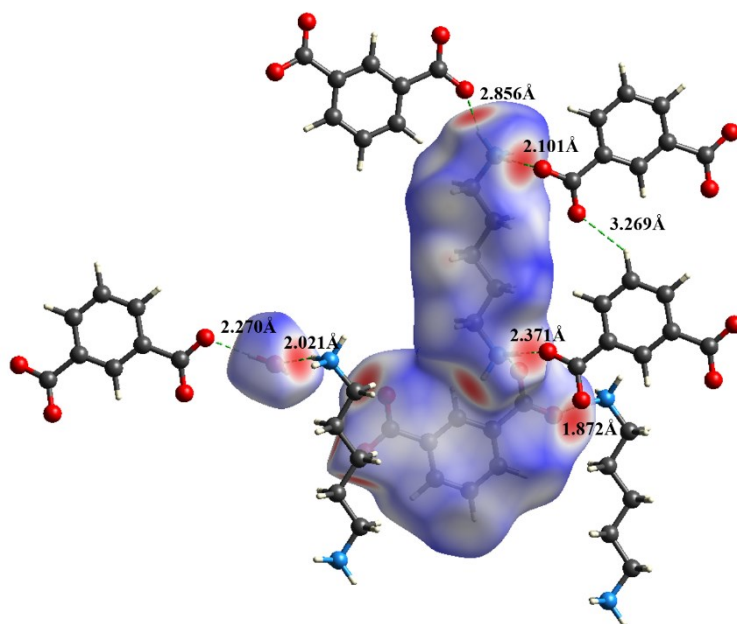

**Figure S6** The distance of hydrogen-bond contacts of the anhydrous form in Figure 7.

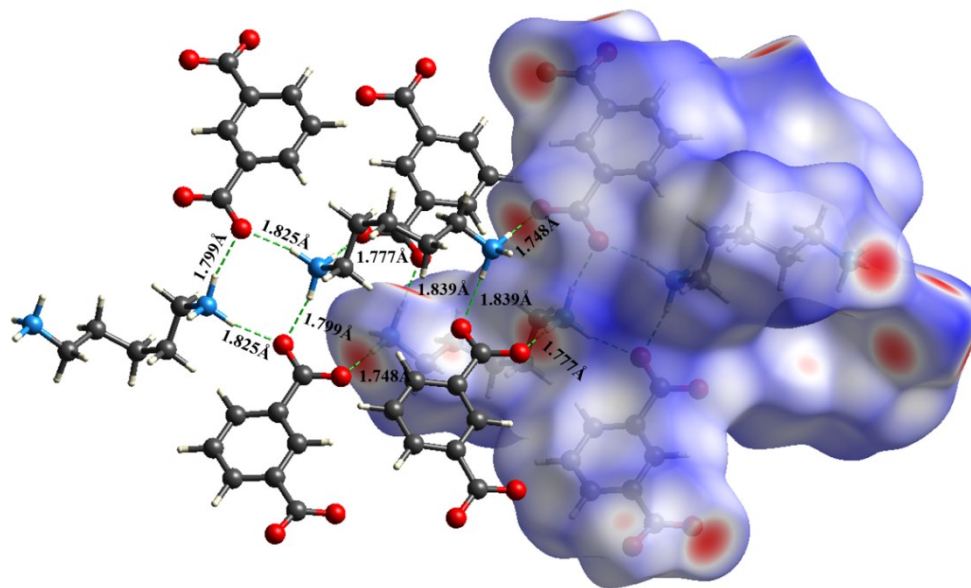

**Figure S7** PXRD diagram of the monohydrate of PDA-IPA after dehydration.

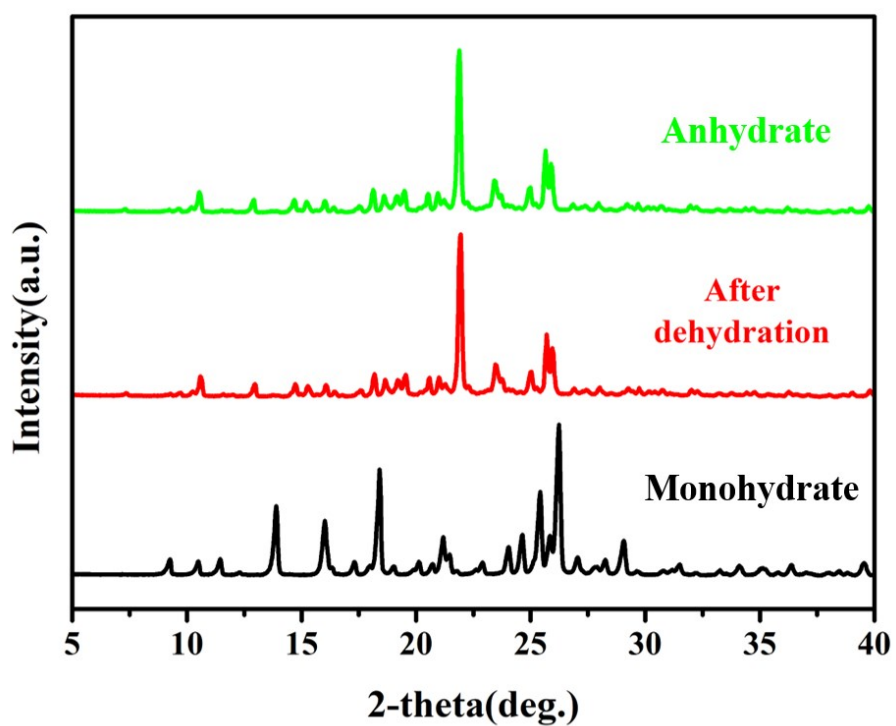

**Figure S8** Hygroscopicity of two PDA-IPA crystal forms under the surrounding conditions with different relative humidity.

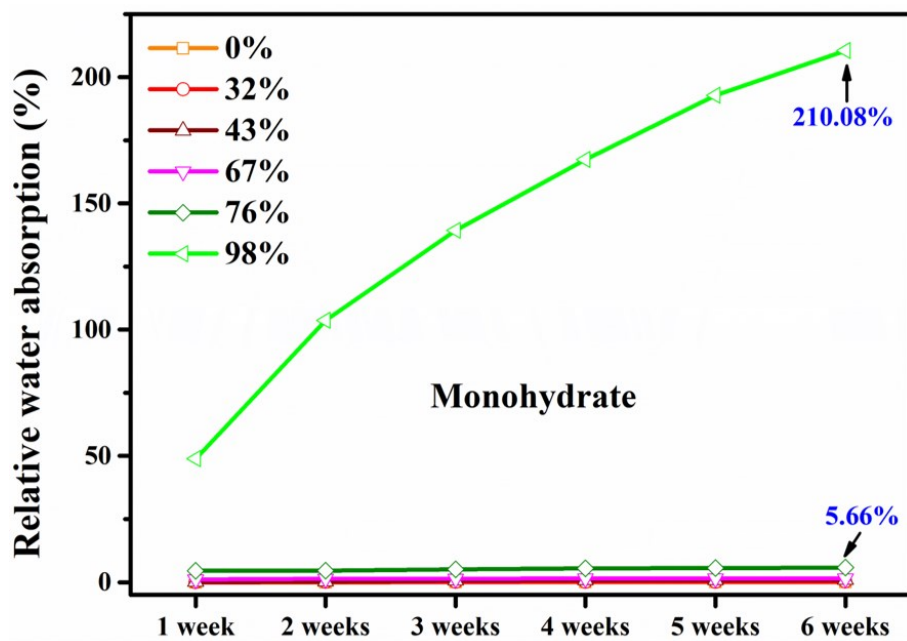

**(a)**

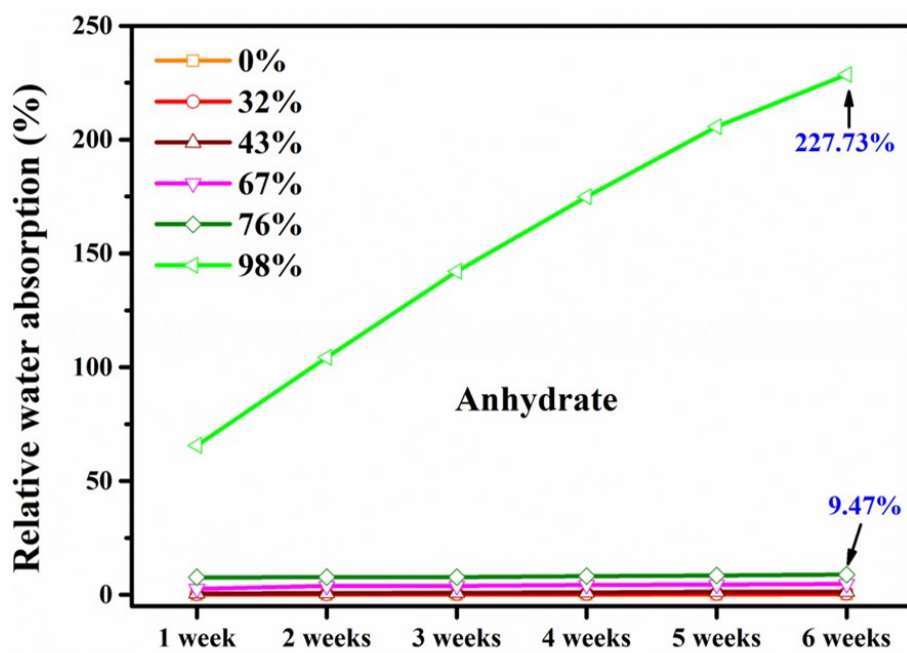

**(b)**



**Figure S9** PXRD diagram of PDA-IPA under different water activity at 25°C.

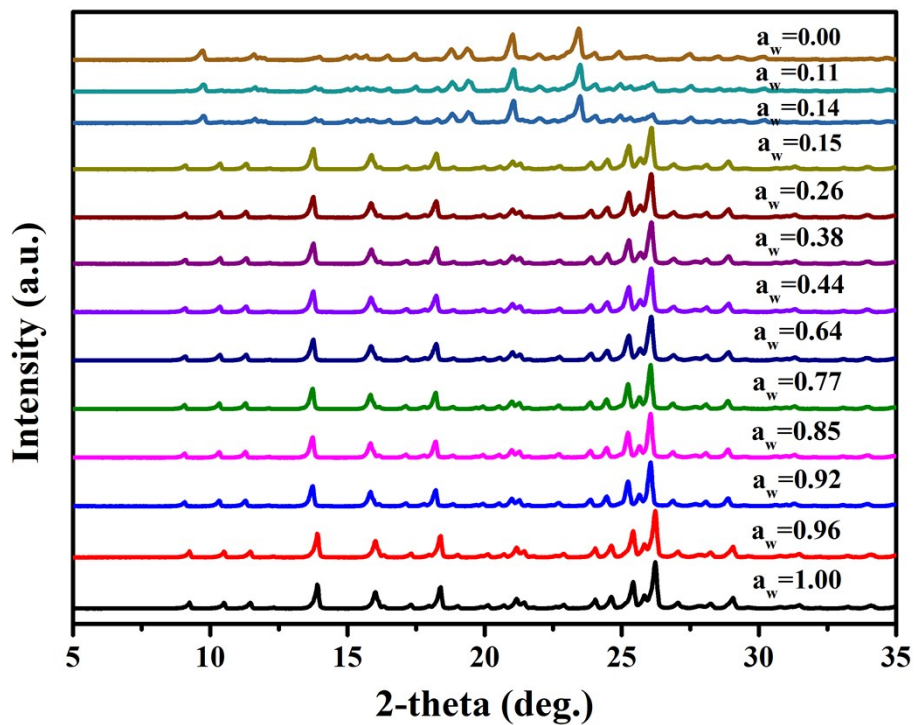

**Figure S10** The critical water activities of the two forms of PDA-IPA at 25°C.

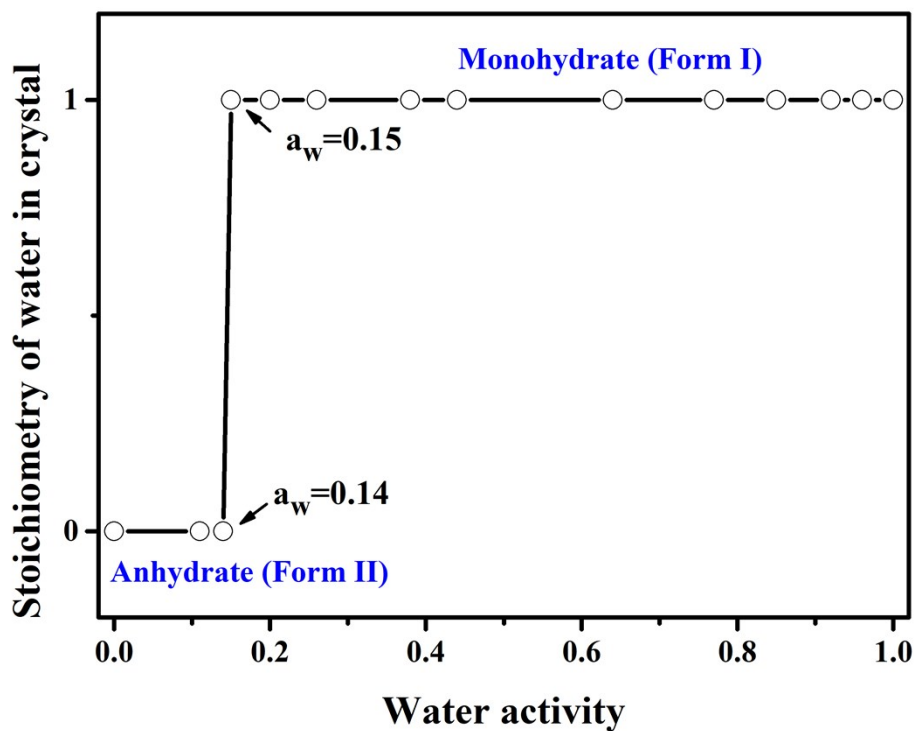

Supplement: d0ra08767j1.pdf [file d0ra08767j1.pdf]
